# Supplementary material for: NF-kappaΒ-inducing kinase regulates stem cell phenotype in breast cancer
Source: PubMed Central journal article supplement (PMC5120353; doi:10.1038/srep37340), 2016-11-23
Supplement: srep37340-s1.pdf [file srep37340-s1.pdf]

## Supplementary information.

### **NF-kappaB-inducing kinase regulates stem cell phenotype in breast cancer.**

*Karla Vazquez-Santillan<sup>1</sup>, Jorge Melendez-Zajgla<sup>1</sup>, Luis Enrique Jimenez-Hernandez,<sup>1</sup> Javier Gaytan-Cervantes<sup>1</sup>, Laura Muñoz-Galindo<sup>1</sup>, Patricia Piña-Sanchez<sup>2</sup>, Gustavo Martinez-Ruiz<sup>1</sup>, Javier Torres<sup>3</sup>, Patricia Garcia-Lopez<sup>4</sup>, Carolina Gonzalez-Torres<sup>1</sup>, Victor Ruiz<sup>5</sup>, Federico Avila-Moreno<sup>6</sup> Marco Velasco-Velazquez<sup>7</sup>, Mayra Perez-Tapia<sup>8</sup>, Vilma Maldonado<sup>1,\*</sup>.*

<sup>1</sup>Instituto Nacional de Medicina Genómica (INMEGEN), México, 14610, México.

<sup>2</sup>Unidad de Investigación Médica en Enfermedades Oncológicas (UIMEO), Hospital de Oncología IMSS, México.

<sup>3</sup>Unidad de Investigación Médica en Enfermedades Infecciosas y Parasitarias (UMAE), Hospital de Pediatría, IMSS, México.

<sup>4</sup>Instituto Nacional de Cancerología (INCAN)

<sup>5</sup>Instituto Nacional de Enfermedades Respiratorias "Ismael Cosío Villegas" (INER), México.

<sup>6</sup>Facultad de Estudios Superiores Iztacala, UNAM, México.

<sup>7</sup>Facultad de Medicina UNAM, México.

<sup>8</sup>Unidad de Desarrollo e Investigación en Bioprocesos (UDIBI) y Departamento de Inmunología, IPN

\* Corresponding author: Vilma Maldonado vilmaml@gmail.com

Karla Vázquez Santillán: kivazquez@inmegen.gob.mx

Jorge Melendez Zajgla: jmelendez@inmegen.gob.mx

Luis Enrique Jiménez Hernández: ljimenez\_035@gmail.com

Patricia Piña Sanchez: patricia\_1307@yahoo.com.mx

Javier Gaytan Cervantes: alternativesplicing@gmail.com

Laura Muñoz Galindo: lauramunozg@gmail.com

Gustavo Martínez Ruiz: gustavobambam@gmail.com

Javier Torres: jtorres157@yahoo.com.mx

Patricia García López: pgarcia\_lopez@yahoo.com.mx

Carolina González Torres: gonzaleztorrescaro@gmail.com

Victor Ruiz: vicoruz@yahoo.com.mx

Federico Avila Moreno: f.avila@campus.iztacala.unam.mx

Marco Velasco Velázquez: marcovelasco@hotmail.com

Mayra Pérez Tapia: maypet@hotmail.com

**Supplementary Table 1.** Tumor formation of BCSCs and non-BCSCs of in immunodeficient *nu/nu* mice.

| Subpopulation     | Cell number         | Tumors formed |
|-------------------|---------------------|---------------|
| MCF7 CD44+/CD24-  | 1 x 10 <sup>5</sup> | 3/3           |
| MCF7 CD44-/CD24+  | 1 x 10 <sup>5</sup> | 0/3           |
| MDA-MB-231 EpCAM+ | 1 x 10 <sup>5</sup> | 3/3           |
| MDA-MB-231 EpCAM- | 1 x 10 <sup>5</sup> | 1/3           |

**Supplementary Table 2. Genes regulated in MCF7 overexpressing-NIK cells**

| Symbol    | Definition                                                         | Fold Change  | raw p-value |
|-----------|--------------------------------------------------------------------|--------------|-------------|
| ACRC      | acidic repeat containing                                           | -2.997798332 | 0.000253853 |
| TSNAXIP1  | translin-associated factor X interacting protein 1                 | -2.938635998 | 0.008106129 |
| PDE5A     | phosphodiesterase 5A, cGMP-specific                                | -2.763263867 | 0.025233844 |
| FOXP2     | forkhead box P2                                                    | -2.70920582  | 0.002484034 |
| MUC4      | mucin 4, cell surface associated                                   | -2.592534762 | 0.005874116 |
| SCG3      | secretogranin III                                                  | -2.509534883 | 0.021167533 |
| EFCAB5    | EF-hand calcium binding domain 5                                   | -2.324257643 | 0.000124181 |
| C5orf60   | chromosome 5 open reading frame 60                                 | -2.298995008 | 0.019017708 |
| CYP4F25P  | cytochrome P450, family 4, subfamily F, polypeptide 25, pseudogene | -2.275026473 | 0.002286685 |
| CCRL1     | chemokine (C-C motif) receptor-like 1                              | -2.270093416 | 0.004832252 |
| INS       | insulin                                                            | -2.190474369 | 0.016429673 |
| ABCB1     | ATP-binding cassette, sub-family B (MDR/TAP), member 1             | -2.187303375 | 0.005396647 |
| ADORA3    | adenosine A3 receptor                                              | -2.170413611 | 0.039321949 |
| IGLV2-23  | immunoglobulin lambda variable                                     | -2.113254712 | 0.008531093 |
| GRM6      | glutamate receptor, metabotropic 6                                 | -2.111819699 | 0.026817403 |
| CDH18     | cadherin 18, type 2                                                | -2.082678284 | 0.007945737 |
| GBGT1     | globoside alpha-1,3-N-acetylgalactosaminyltransferase 1            | -2.048682856 | 0.000232321 |
| ITGA8     | integrin, alpha 8                                                  | -2.044686982 | 0.00810342  |
| PRH2      | proline-rich protein HaeIII subfamily 2                            | -2.027146001 | 0.009538984 |
| CYP19A1   | cytochrome P450, family 19, subfamily A, polypeptide 1             | -2.00904981  | 0.016221972 |
| GPM6B     | glycoprotein M6B                                                   | -2.00784792  | 0.03724353  |
| KIAA1045  | KIAA1045                                                           | -1.976146632 | 0.007334539 |
| RN7SL472P | RNA, 7SL, cytoplasmic 472, pseudogene                              | -1.973108102 | 0.00014591  |
| LEPREL1   | leprecan-like 1                                                    | -1.964104468 | 0.025005985 |
| TPD52L3   | tumor protein D52-like 3                                           | -1.952401818 | 0.012042181 |
| GLB1L3    | galactosidase, beta 1-like 3                                       | -1.926179592 | 0.004089145 |
| SERPINB3  | serpin peptidase inhibitor, clade B (ovalbumin), member 3          | -1.924099403 | 0.051862256 |
| NEFL      | neurofilament, light polypeptide                                   | -1.904413375 | 0.000149016 |
| ALK       | anaplastic lymphoma receptor tyrosine kinase                       | -1.890074804 | 0.03084883  |
| TEX12     | testis expressed 12                                                | -1.885481942 | 0.003118034 |
| CCL26     | chemokine (C-C motif) ligand 26                                    | -1.86276197  | 0.03401562  |
| PTPRN     | protein tyrosine phosphatase, receptor type, N                     | -1.853929864 | 0.050321571 |
| PLCL2     | phospholipase C-like 2                                             | -1.834573874 | 0.009271919 |
| snoU13    | Small nucleolar RNA U13                                            | -1.83028714  | 7.9E-05     |
| SULT1C3   | sulfotransferase family, cytosolic, 1C, member 3                   | -1.829610647 | 0.000149746 |
| CATSPERB  | catsper channel auxiliary subunit beta                             | -1.808865326 | 0.017453792 |
| PDE6B     | phosphodiesterase 6B, cGMP-specific, rod, beta                     | -1.806169556 | 0.023858459 |
| GDF15     | growth differentiation factor 15                                   | 1.523377332  | 0.000567534 |
| BIRC3     | baculoviral IAP repeat containing 3                                | 1.50941989   | 0.003332765 |

|             |                                                                      |             |             |
|-------------|----------------------------------------------------------------------|-------------|-------------|
| DEPDC4      | DEP domain containing 4                                              | 1.800686047 | 0.002331078 |
| ZNF595      | zinc finger protein 595                                              | 1.805241271 | 0.000168266 |
| AICDA       | activation-induced cytidine deaminase                                | 1.834843056 | 0.002187369 |
| ENKUR       | enkurin, TRPC channel interacting protein                            | 1.847396235 | 0.014241283 |
| UGT1A6      | UDP glucuronosyltransferase 1 family, polypeptide A6                 | 1.856561792 | 0.026398801 |
| BTBD8       | BTB (POZ) domain containing 8                                        | 1.862180174 | 0.011850701 |
| TLDC1       | TBC/LysM-associated domain containing 1                              | 1.864019131 | 0.008675778 |
| PYHIN1      | pyrin and HIN domain family, member 1                                | 1.880709035 | 0.03904283  |
| FAM98B      | family with sequence similarity 98, member B                         | 1.90663894  | 0.019620982 |
| U6          | U6 spliceosomal RNA                                                  | 1.90878772  | 0.008523232 |
| CEP170P1    | centrosomal protein 170kDa pseudogene 1                              | 1.924512889 | 0.001725804 |
| MAP3K14-AS1 | MAP3K14 antisense RNA 1                                              | 1.944119185 | 5.66E-05    |
| ATP8B5P     | ATPase, class I, type 8B, member 5, pseudogene                       | 1.94815257  | 0.015025654 |
| MRPL30      | mitochondrial ribosomal protein L30                                  | 1.953222993 | 0.011717307 |
| CTSE        | cathepsin E                                                          | 1.958464983 | 0.005720327 |
| Y RNA       | Y RNA                                                                | 1.959383776 | 0.000963941 |
| SKAP1       | src kinase associated phosphoprotein                                 | 1.965296066 | 0.004595609 |
| SH3BP2      | SH3-domain binding protein 2                                         | 1.978252618 | 0.00273059  |
| ELMOD3      | ELMO/CED-12 domain containing 3                                      | 1.989620577 | 0.002571864 |
| ZKSCAN3     | zinc finger with KRAB and SCAN domains 3                             | 1.991713312 | 0.006112225 |
| ADPRM       | ADP-ribose/CDP-alcohol diphosphatase, manganese-dependent            | 1.993306183 | 0.009358243 |
| NCF1        | neutrophil cytosolic factor 1                                        | 1.99735393  | 0.002575318 |
| ANKRD18B    | ankyrin repeat domain 18B                                            | 2.000429797 | 0.010149451 |
| MIR21       | microRNA 21                                                          | 2.010043421 | 0.001670391 |
| EML2        | echinoderm microtubule associated protein like 2                     | 2.051818806 | 0.037724416 |
| TTC18       | tetratricopeptide repeat domain 18                                   | 2.11207344  | 0.00159627  |
| SLC12A6     | solute carrier family 12 (potassium/chloride transporters), member 6 | 2.144839955 | 0.011965818 |
| DUSP6       | dual specificity phosphatase 6                                       | 2.156315579 | 0.000486362 |
| IFNA7       | interferon, alpha 7                                                  | 2.185242419 | 0.014898222 |
| SSBP1       | single-stranded DNA binding protein 1, mitochondrial                 | 2.197642425 | 0.007923309 |
| SSUH2       | ssu-2 homolog (C. elegans)                                           | 2.243788458 | 0.005073442 |
| CCDC158     | coiled-coil domain containing 158                                    | 2.271969289 | 0.017940798 |
| TCN1        | transcobalamin I (vitamin B12 binding protein, R binder family)      | 2.294436691 | 0.000296253 |
| IGLV2-11    | immunoglobulin lambda variable 2-11                                  | 2.350845945 | 0.007979251 |
| CGRRF1      | cell growth regulator with ring finger domain 1                      | 2.423042987 | 0.036436367 |
| TCP11L1     | t-complex 11, testis-specific-like 1                                 | 2.448389919 | 3.08E-05    |
| COL5A2      | collagen, type V, alpha 2                                            | 2.499783814 | 0.001452101 |
| EGR1        | early growth response 1                                              | 2.527017812 | 1.72E-05    |
| TRAJ17      | T cell receptor alpha joining 17                                     | 2.550658935 | 0.014304261 |
| CCPG1       | cell cycle progression 1                                             | 2.874783545 | 0.048506819 |
| MAP3K14     | mitogen-activated protein kinase kinase kinase 14                    | 10.76089871 | 2.27E-07    |

**Supplementary Table 3.- Genes regulated in deficient NIK cells**

| Symbol     | Definition                                                          | Fold Change  | P-value     |
|------------|---------------------------------------------------------------------|--------------|-------------|
| PRKG1      | protein kinase, cGMP-dependent, type I                              | -2.520092461 | 1.55E-05    |
| OC90       | Otoconin-90                                                         | -2.487747391 | 0.002698203 |
| IGLV4-3    | immunoglobulin lambda variable 4-3                                  | -2.444794721 | 0.000335441 |
| ALLC       | allantoicase                                                        | -2.258502744 | 0.005631608 |
| NEFL       | neurofilament, light polypeptide                                    | -2.248994293 | 0.006125414 |
| CSPG4      | chondroitin sulfate proteoglycan 4                                  | -2.220477573 | 0.008242372 |
| MAP2K6     | mitogen-activated protein kinase kinase 6                           | -2.148614509 | 0.00686966  |
| DENND3     | DENN/MADD domain containing 3                                       | -2.102122387 | 0.014025744 |
| LEPREL1    | leprecan-like 1                                                     | -2.067513381 | 0.005735957 |
| CPLX1      | complexin 1                                                         | -2.001511632 | 0.015089237 |
| GLB1L3     | galactosidase, beta 1-like 3                                        | -1.986285953 | 0.000152846 |
| NXF3       | nuclear RNA export factor 3                                         | -1.931346028 | 0.002604077 |
| TEX12      | testis expressed 12                                                 | -1.914516375 | 0.000801005 |
| CCDC150    | coiled-coil domain containing 150                                   | -1.902755249 | 0.015637514 |
| CCRL1      | chemokine (C-C motif) receptor-like 1                               | -1.881517446 | 0.000412245 |
| C6         | complement component 6                                              | -1.877027777 | 0.001394614 |
| TAL1       | T-cell acute lymphocytic leukemia 1                                 | -1.876030565 | 0.000512159 |
| TPD52L3    | tumor protein D52-like 3                                            | -1.873855882 | 0.010192919 |
| CHRNA7     | cholinergic receptor, nicotinic, alpha 7 (neuronal)                 | -1.844338332 | 0.000130025 |
| AC013269.5 | Uncharacterized protein                                             | -1.827686126 | 0.006476783 |
| AC140481.2 | Uncharacterized protein                                             | -1.827686126 | 0.006476783 |
| RYBP       | RING1 and YY1 binding protein                                       | 1.825957686  | 0.000483636 |
| SUMF1      | sulfatase modifying factor 1                                        | 1.829762837  | 0.005893955 |
| SSBP1      | single-stranded DNA binding protein 1, mitochondrial                | 1.83046899   | 0.007488112 |
| OLFM3      | olfactomedin 3                                                      | 1.863717679  | 0.014594876 |
| MT-TT      | mitochondrially encoded tRNA threonine                              | 1.87272189   | 0.000123071 |
| TCP11L1    | t-complex 11, testis-specific-like 1                                | 1.881287057  | 0.002615535 |
| U6         | U6 spliceosomal RNA                                                 | 1.885316407  | 0.001065489 |
| PRG4       | proteoglycan 4                                                      | 1.913008565  | 0.003799423 |
| DNAH14     | dynein, axonemal, heavy chain 14                                    | 1.913888345  | 0.005696986 |
| U6         | U6 spliceosomal RNA                                                 | 1.923352684  | 0.000749655 |
| SLC4A5     | solute carrier family 4, sodium bicarbonate cotransporter, member 5 | 1.945727939  | 0.001113093 |
| CCDC129    | coiled-coil domain containing 129                                   | 1.946438372  | 0.004677811 |
| WDR19      | WD repeat domain 19                                                 | 1.953362898  | 0.002967937 |
| SSUH2      | ssu-2 homolog                                                       | 1.978769179  | 0.014936233 |
| U6         | U6 spliceosomal RNA                                                 | 1.996338917  | 0.012040764 |
| RNY1P5     | RNA, Ro-associated Y1 pseudogene 5                                  | 2.006183169  | 0.012311836 |
| TRDN       | triadin                                                             | 2.006973638  | 0.001042032 |

|               |                                                                                         |             |             |
|---------------|-----------------------------------------------------------------------------------------|-------------|-------------|
| CDC14B        | cell division cycle 14B                                                                 | 2.041370902 | 0.000104669 |
| CYP2D6        | cytochrome P450, family 2, subfamily D, polypeptide 6                                   | 2.047996619 | 0.00296561  |
| UBAC2         | UBA domain containing 2                                                                 | 2.052122233 | 0.000566799 |
| BTBD9         | BTB (POZ) domain containing 9                                                           | 2.065412582 | 0.003121109 |
| IL7           | interleukin 7                                                                           | 2.069506338 | 1.12E-05    |
| ANGPTL1       | angiopoietin-like 1                                                                     | 2.094167249 | 0.012606112 |
| ACTR3B        | ARP3 actin-related protein 3 homolog B (yeast)                                          | 2.135839641 | 0.000273097 |
| ATP8B5P       | ATPase, class I, type 8B, member 5, pseudogene                                          | 2.14827696  | 0.001855622 |
| SOCS6         | suppressor of cytokine signaling 6                                                      | 2.212969141 | 0.003464457 |
| GBA3          | glucosidase, beta, acid 3 (cytosolic)                                                   | 2.259363919 | 0.012010093 |
| NDUFA5        | NADH dehydrogenase (ubiquinone) 1 alpha subcomplex, 5, 13kDa                            | 2.438972233 | 0.005192536 |
| STON1-GTF2A1L | STON1-GTF2A1L readthrough                                                               | 2.441644791 | 7.44E-05    |
| GNAI1         | guanine nucleotide binding protein (G protein), alpha inhibiting activity polypeptide 1 | 2.567207661 | 0.000516532 |
| BOC           | BOC cell adhesion associated, oncogene regulated                                        | 2.707872854 | 0.000342732 |
| TRAV1-2       | T cell receptor alpha variable 1-2                                                      | 2.830257532 | 0.005508257 |

**Supplementary Table 4.- Primers used for q-RT-PCR analysis.**

| Name    | Primer  | Sequence                  | TM |
|---------|---------|---------------------------|----|
| ALDH1A1 | Forward | TGTTAGCTGATGCCGACTTG      | 56 |
|         | Reverse | TTCTTAGCCCGCTCAACACT      |    |
| ALDH1A3 | Forward | GCATACCGTGGAAGGGCG        | 57 |
|         | Reverse | GCTCTCTGGGCTATTGATTCTGTC  |    |
| ALDH8A1 | Forward | CAGGCTACTTTATGCTTCCCAC    | 55 |
|         | Reverse | GCTCTTTCAATCACCTCCTCTT    |    |
| OCT4    | Forward | ACATCAAAGCTCTGCAGAAAGAAC  | 56 |
|         | Reverse | CTGAATACCTTCCCAAATAGAACCC |    |
| SOX2    | Forward | AGGAGTTGTCAAGGCAGAG       | 56 |
|         | Reverse | CCGCCGATGATTGTTATT        |    |
| NANOG   | Forward | AGGCAAACAACCCACTTCTG      | 57 |
|         | Reverse | TCTGCTGGAGGCTGAGGTAT      |    |
| NIK     | Forward | TTAGAAACACCCCGCAGTTC      | 56 |
|         | Reverse | TCCACACGTGGTTCAGACAT      |    |
| TBP     | Forward | TGCCACACCCTGCAACTCAACA    | 60 |
|         | Reverse | CCCCTTCATTGACCTCAACT      |    |
| EGR1    | Forward | AGAGCCGCACCCAGCAGCCT      | 60 |
|         | Reverse | GGGCAAGCGTAAGGGCGTTCGT    |    |
| DUSP6   | Forward | GTGACAACAGGGTTCAGCACAGCA  | 60 |
|         | Reverse | GGCCAGACACATTCCAGCAAGGAGG |    |
| TCN1    | Forward | TGGGAACTACTCAAC CGCCGA    | 60 |
|         | Reverse | GGTCAGAGCCAGGACAGCCA      |    |
| MAP2K6  | Forward | TCTGACATTTGGAGTCTGGGCATCA | 60 |
|         | Reverse | GTCTGCTGGGAGTTGTGGCG      |    |
| GDF15   | Forward | TGAGACACCCGATTCTGCCCCAAA  | 60 |
|         | Reverse | CAGCCCCCGAGTCCCCAAGA      |    |
| EGR1    | Forward | AGAGCCGCACCCAGCAGCCT      | 60 |
|         | Reverse | GGGCAAGCGTAAGGGCGTTCGT    |    |
| CSPG4   | Forward | GCCTTCACCAACTTCTCCTCCTCT  | 60 |
|         | Reverse | TGACGTTCACTACGGCTGATGC    |    |
| ERK2    | Forward | CTGTTCCCAAATGCTGACTCCAAA  | 60 |
|         | Reverse | GCCAGAGCCTGTTCTACTTCAATC  |    |
| ERK1    | Forward | CATTCTGGGCATCCTGGGCTC     | 60 |
|         | Reverse | GGAGGGCAGAGACTGTAGGTAGTTT |    |

**Supplementary Table 5.** Expression of NF- $\kappa$ B inducing kinase (NIK) in breast cancer patients by immunohistochemistry.

| <b>Percentage of cells</b> | <b>NIK+ patients</b> | <b>ALDH+ patients</b> |
|----------------------------|----------------------|-----------------------|
| <i>0 %</i>                 | 39 (20.5%)           | 85 (44.7%)            |
| <i>1-10 %</i>              | 30 (15.7%)           | 55 (28.9%)            |
| <i>11-50 %</i>             | 47 (24.7%)           | 29 (15.2%)            |
| <i>51-70 %</i>             | 17 (8.9%)            | 11 (5.9%)             |
| <i>70-100 %</i>            | 57 (30%)             | 10 (5.2%)             |
| <b><i>Total cases</i></b>  | 190                  | 190                   |



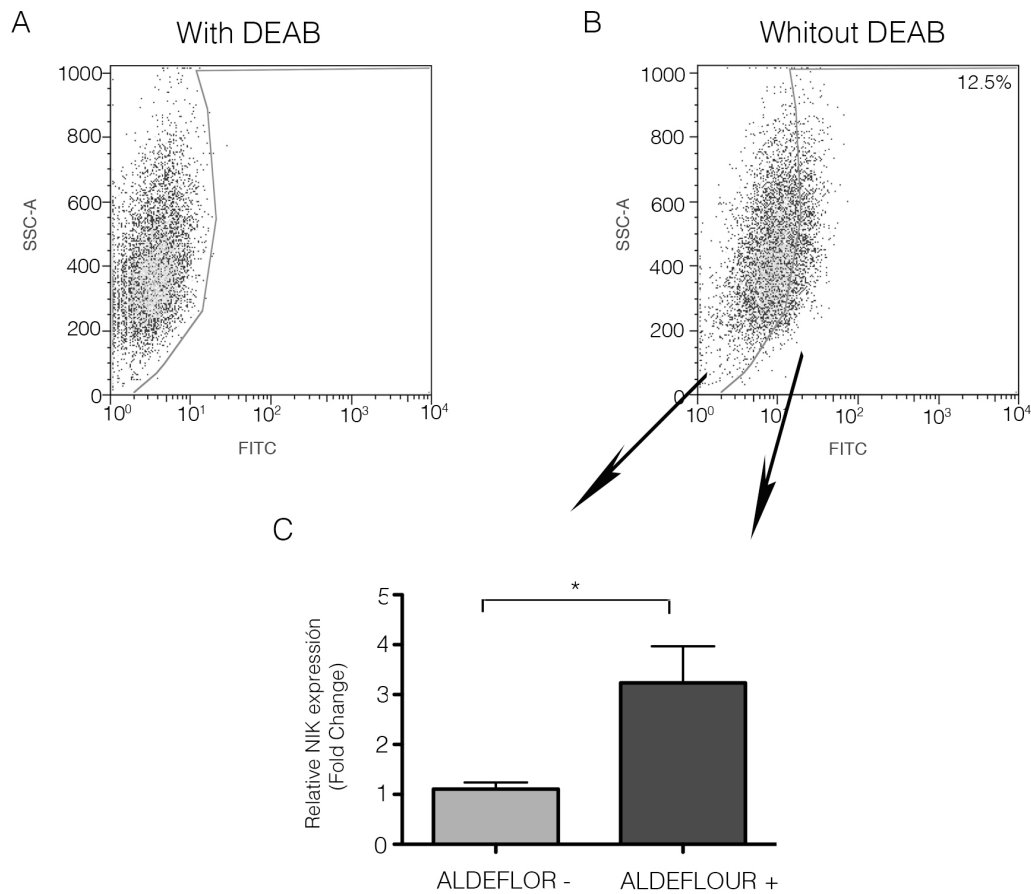

**SUPPLEMENTARY FIGURE 1.** NIK is enriched in MDA-MB-231 cells exhibiting ALDH activity. (A-B): ALDH activity was evaluated using the ALDEFLOUR assay kit. A total of  $1 \times 10^6$  MDA-MB-231 cells were incubated with 5ul of activated ALDEFLOUR substrate during 30 min. (A): DEAB was used as a control to establish the baseline fluorescence of these cells. (B): Incubation of cells without DEAB induces a shift in fluorescence defining the population with ALDH activity. (C): NIK expression was analyzed by Real Time PCR in ALDEFLOUR negative and positive cells. Data are expressed as fold change relative to ALDEFLOUR negative cells (n=2, error bars are +/- s.e.m)

A

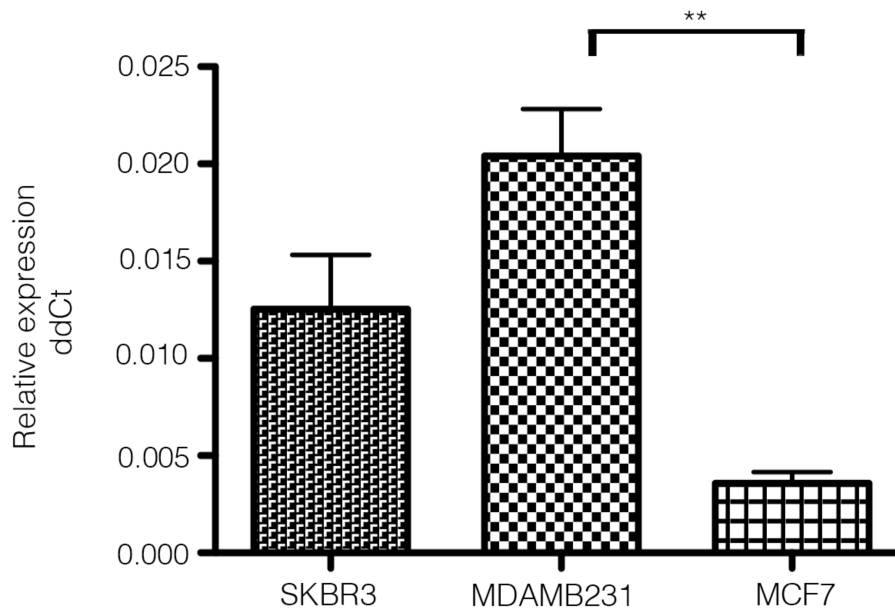

**SUPPLEMENTARY FIGURE 2.** NIK expression in breast cancer cell lines. NIK expression was analyzed by Real Time PCR in three breast cancer cell lines. Data are expressed as relative expression (n=3, error bars are +/- s.e.m, \*\*p=0.005)

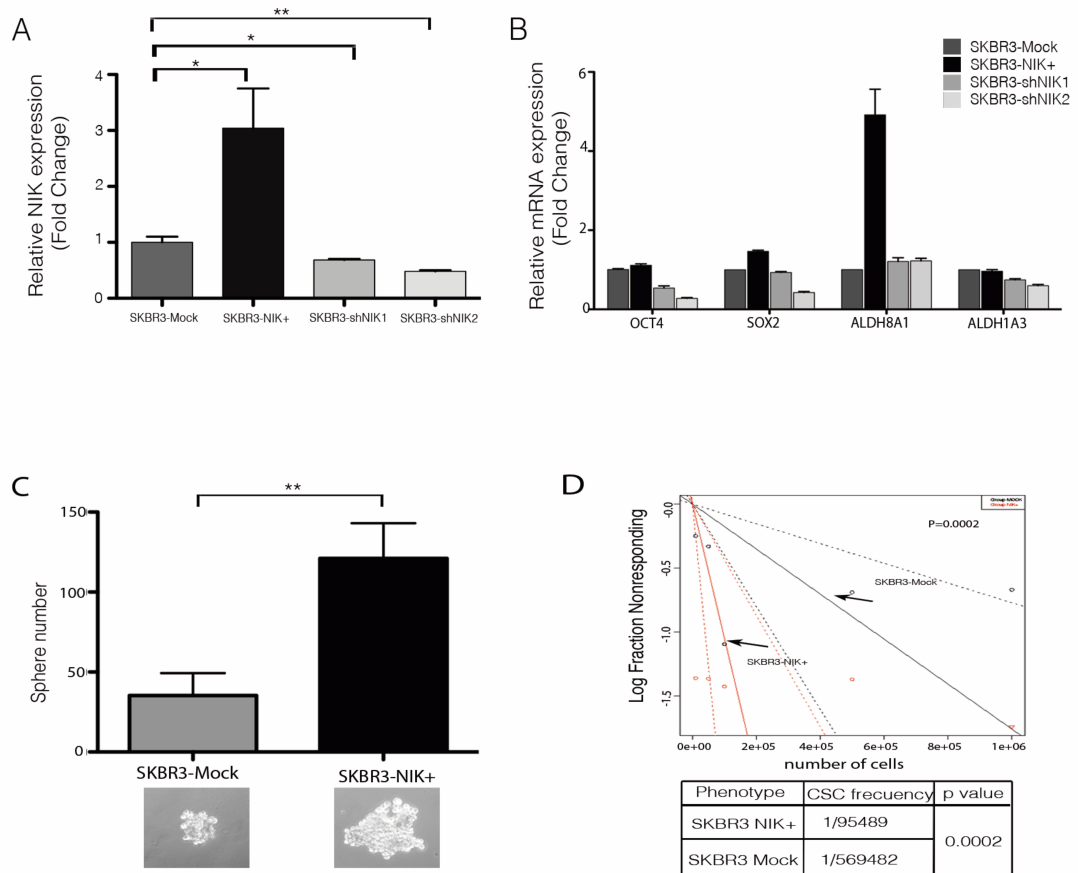

**SUPPLEMENTARY FIGURE 3. NIK regulates stemness in SKBR3 cells.** (A) To modulate NIK expression, two shRNA and an expression vector were used in SKBR3 cells. NIK expression was analyzed by Real Time PCR and normalized to TBP. Data are expressed as fold change relative to Mock cell (n=3, error bars a \*P<0.05). (B): The level of CSC markers was analyzed in stable NIK-overexpressing and in NIK depleted SKBR cells. Data are expressed as fold change relative to Mock cell (n=3, error bars a \*P<0.05). (C): Quantification of mammosphere number derived from SKBR mock cells (SKBR3-Mock) and NIK-overexpressing SKBR3 cells (SKBR3-NIK+) in both first and second passages. For mammosphere assay,  $2.5 \times 10^5$  cells/ml of each cell line were seeded. (n=3, error bars are s.e.m., \*p< 0.04). (H): A total of 16 mice were inoculated with 10000 (n=4), 50000 (n=4), 100000 (n=4), 500000 (n=4) and 1000000 (n=4) NIK-overexpressing and SKBR3 control cells. SKBR3 stable NIK-overexpressing cells were inoculated into the right flanks and SKBR3 control cells in the left flank. Tumors were monitored each week during 45 days. The frequency of cancer stem cells was calculated using ELDA software.

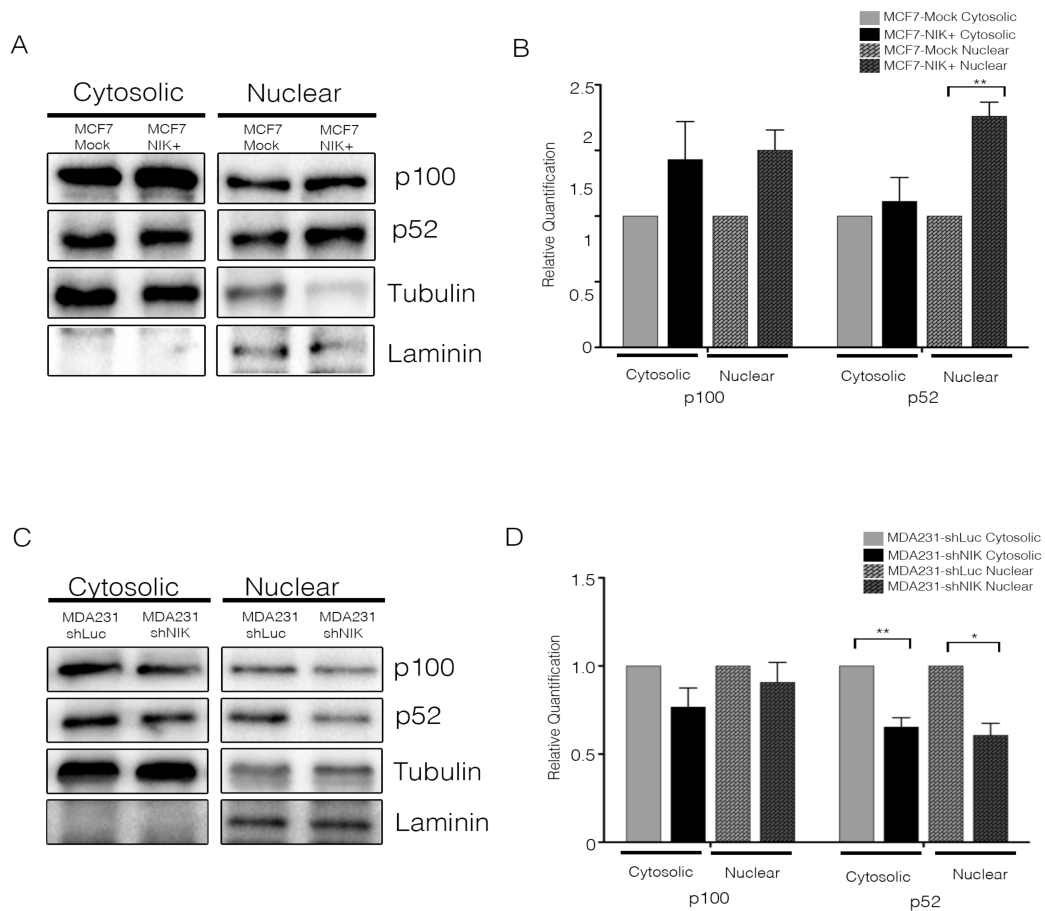

**SUPPLEMENTARY FIGURE 4. NIK promotes the processing of p100 to p52.** (A): Subcellular fraction was carried out with  $1 \times 10^6$  MCF7 NIK-overexpressing or MCF7 mock cells. Western Blot of p100 and p52 was performed in nuclear and cytosolic fraction. (B) Densitometric scans from three independent assays were quantified, nuclear expression was normalized to lamine A/C and cytosolic expression was normalized to  $\alpha$  Tubulin. Data are expressed as fold change relative to mock cells ( $n=3$ , error bars are  $\pm$  s.e.m,  $**p=0.002$ ). (B): Subcellular fraction was carried out with  $1 \times 10^6$  MDA-MB-231 depleted NIK cells or mock cells. Western Blot of p100 and p52 was performed in nuclear and cytosolic fraction. (B) Densitometric scans from three independent assays were quantified, nuclear expression was normalized to lamine A/C and cytosolic expression was normalized to  $\alpha$  Tubulin. Data are expressed as fold change relative to mock cells ( $n=3$ , error bars are  $\pm$  s.e.m,  $**p=0.0027$  and  $*p=0.02$ ).

A

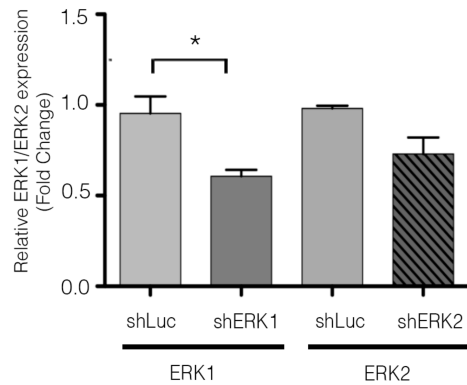

B

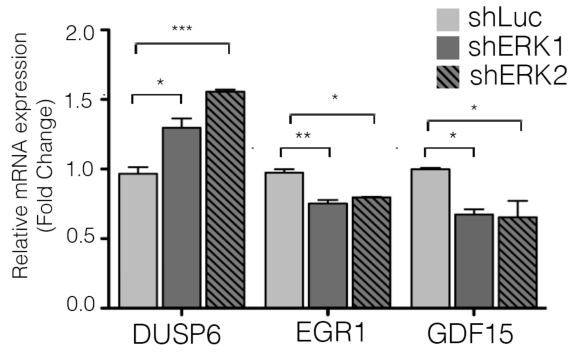

**SUPPLEMENTARY FIGURE 5.** (A): To knockdown ERK1 and ERK2, two shRNAs against ERK1 and ERK2 were used in MCF7 cell lines. ERK1/2 expression was analyzed by Real Time PCR (RT-qPCR) and normalized to TBP. Data are expressed as fold change relative to mock cells (n=3, error bars are +/- s.e.m, \*P=0.02). (B): Expression of DUSP6, EGR1 and GDF15 analyzed by RT-qPCR and normalized to TBP. Data are expressed as fold change relative to mock cells (n=3, error bars are +/- s.e.m, \*P<0.05).
